# Supplementary material
Source: MDPI journal article supplement (https://www.mdpi.com/2073-4441/13/13/1722)
Supplement: s1 [file s1]

## Article

# Effects of the Antidepressants Citalopram and Venlafaxine on the Big Ramshorn Snail (*Planorbarius Corneus*) Histopathology

Michael Ziegler <sup>1,\*</sup>, Helene Eckstein <sup>1</sup>, Heinz-R. Köhler <sup>1</sup>, Selina Tisler <sup>2</sup>, Christian Zwiener <sup>2</sup> and Rita Triebkorn <sup>1,3</sup>

**Table S1.** Detailed overview on the symptoms identified during the semi-quantitative histological evaluation. The experiment with big ramshorn snail with the respective treatment are listed in rows and the assessed symptoms are listed in columns. Each symptom is divided into three severity categories (white/0: not detected, light grey/0.5: detected in moderate frequency/severity, dark grey/1: detected in high frequency/severity). Values depict the absolute number of samples showing the symptom. CIT=citalopram, VEN=venlafaxine.

| Treatment     | Tubule Apex Protrusion |     |   | Tubule Irregular Basis |     |   | Dilated Tubule Lumen |     |   | Irregular Nucleus of Digestive Cells |     |   | Irregular Compartmentation of Digestive Cells |     |    | Irregular Nucleus of Crypt Cells |     |   | Irregular Cytoplasm of Crypt Cells |     |    |
|---------------|------------------------|-----|---|------------------------|-----|---|----------------------|-----|---|--------------------------------------|-----|---|-----------------------------------------------|-----|----|----------------------------------|-----|---|------------------------------------|-----|----|
|               | 0                      | 0.5 | 1 | 0                      | 0.5 | 1 | 0                    | 0.5 | 1 | 0                                    | 0.5 | 1 | 0                                             | 0.5 | 1  | 0                                | 0.5 | 1 | 0                                  | 0.5 | 1  |
| control       | 8                      | 0   | 7 | 15                     | 0   | 0 | 3                    | 6   | 6 | 15                                   | 0   | 0 | 10                                            | 1   | 4  | 13                               | 1   | 1 | 3                                  | 2   | 10 |
| 1 µg/L CIT    | 8                      | 1   | 4 | 13                     | 0   | 0 | 6                    | 3   | 4 | 13                                   | 0   | 0 | 10                                            | 1   | 2  | 10                               | 0   | 2 | 3                                  | 2   | 8  |
| 10 µg/L CIT   | 9                      | 0   | 5 | 14                     | 0   | 0 | 6                    | 6   | 2 | 14                                   | 0   | 0 | 9                                             | 3   | 2  | 11                               | 1   | 2 | 3                                  | 4   | 7  |
| 100 µg/L CIT  | 11                     | 2   | 1 | 14                     | 0   | 0 | 3                    | 5   | 6 | 14                                   | 0   | 0 | 8                                             | 1   | 5  | 9                                | 1   | 4 | 1                                  | 1   | 12 |
| 1000 µg/L CIT | 5                      | 1   | 9 | 15                     | 0   | 0 | 0                    | 9   | 6 | 15                                   | 0   | 0 | 3                                             | 1   | 11 | 11                               | 2   | 2 | 0                                  | 2   | 13 |
| control       | 5                      | 4   | 4 | 13                     | 0   | 0 | 3                    | 5   | 5 | 13                                   | 0   | 0 | 6                                             | 2   | 5  | 12                               | 1   | 0 | 1                                  | 7   | 5  |
| 1 µg/L VEN    | 5                      | 3   | 6 | 14                     | 0   | 0 | 5                    | 6   | 3 | 14                                   | 0   | 0 | 3                                             | 3   | 8  | 10                               | 2   | 2 | 0                                  | 7   | 7  |
| 10 µg/L VEN   | 7                      | 5   | 3 | 15                     | 0   | 0 | 8                    | 6   | 1 | 15                                   | 0   | 0 | 7                                             | 5   | 3  | 13                               | 2   | 0 | 2                                  | 6   | 7  |
| 100 µg/L VEN  | 7                      | 3   | 5 | 15                     | 0   | 0 | 7                    | 7   | 1 | 15                                   | 0   | 0 | 8                                             | 4   | 3  | 14                               | 1   | 0 | 1                                  | 9   | 5  |
| 1000 µg/L VEN | 8                      | 1   | 4 | 13                     | 0   | 0 | 5                    | 6   | 2 | 13                                   | 0   | 0 | 4                                             | 5   | 4  | 11                               | 2   | 0 | 2                                  | 8   | 3  |

## Water conditions

**Table S2.** Water quality parameters during the experiment with big ramshorn snail exposed to citalopram. Mean values are shown.

| Sampling Date    | Treatment Citalopram | pH   | Conductivity (µs/cm) | Temperature (°C) | Oxygen Concentration (mg/L) | Oxygen Saturation (%) |
|------------------|----------------------|------|----------------------|------------------|-----------------------------|-----------------------|
| 26 October 2017  | control              | 8.22 | 487.33               | 10.53            | 10.44                       | 98.37                 |
| 26 October 2017  | 1 µg/L               | 8.25 | 483.67               | 10.97            | 10.38                       | 98.20                 |
| 26 October 2017  | 10 µg/L              | 8.32 | 483.33               | 10.73            | 10.41                       | 98.30                 |
| 26 October 2017  | 100 µg/L             | 8.16 | 483.67               | 10.93            | 10.35                       | 98.03                 |
| 26 October 2017  | 1000 µg/L            | 8.33 | 484.67               | 10.77            | 10.41                       | 98.33                 |
| 24 November 2017 | control              | 8.33 | 482.00               | 10.65            | 10.12                       | 96.00                 |
| 24 November 2017 | 1 µg/L               | 8.31 | 484.75               | 10.78            | 10.08                       | 96.00                 |
| 24 November 2017 | 10 µg/L              | 8.30 | 477.50               | 10.80            | 10.03                       | 95.75                 |
| 24 November 2017 | 100 µg/L             | 8.27 | 480.50               | 10.75            | 10.02                       | 95.50                 |
| 24 November 2017 | 1000 µg/L            | 8.30 | 480.00               | 10.73            | 10.04                       | 95.80                 |

**Table S3.** Water quality parameters during the experiment with big ramshorn snail exposed to venlafaxine. Mean values are shown.

| Sampling Date | Treatment Venlafaxine       | pH   | Conductivity ( $\mu\text{S}/\text{cm}$ ) | Temperature ( $^{\circ}\text{C}$ ) | Oxygen Concentration ( $\text{mg}/\text{L}$ ) | Oxygen Saturation (%) |
|---------------|-----------------------------|------|------------------------------------------|------------------------------------|-----------------------------------------------|-----------------------|
| 15 June 2018  | control                     | 7.03 | 486.67                                   | 12.40                              | 10.09                                         | 99.67                 |
| 15 June 2018  | 1 $\mu\text{g}/\text{L}$    | 7.00 | 486.33                                   | 12.20                              | 10.12                                         | 99.60                 |
| 15 June 2018  | 10 $\mu\text{g}/\text{L}$   | 7.08 | 482.67                                   | 12.20                              | 10.12                                         | 99.53                 |
| 15 June 2018  | 100 $\mu\text{g}/\text{L}$  | 7.18 | 488.00                                   | 12.13                              | 10.12                                         | 99.60                 |
| 15 June 2018  | 1000 $\mu\text{g}/\text{L}$ | 7.28 | 484.00                                   | 12.23                              | 10.11                                         | 99.43                 |
| 13 July 2018  | control                     | 7.37 | 490.33                                   | 12.97                              | 10.06                                         | 100.20                |
| 13 July 2018  | 1 $\mu\text{g}/\text{L}$    | 7.41 | 486.00                                   | 12.73                              | 10.05                                         | 99.93                 |
| 13 July 2018  | 10 $\mu\text{g}/\text{L}$   | 7.48 | 484.67                                   | 12.80                              | 10.04                                         | 99.90                 |
| 13 July 2018  | 100 $\mu\text{g}/\text{L}$  | 7.54 | 487.00                                   | 12.73                              | 10.06                                         | 100.10                |
| 13 July 2018  | 1000 $\mu\text{g}/\text{L}$ | 7.59 | 489.00                                   | 12.77                              | 10.04                                         | 100.00                |

### Chemical Analysis

**Table S4.** Operating parameters of the triple quadrupole MS (Agilent 6490 QqQ) in positive mode.

| Parameter              | Set Point              |
|------------------------|------------------------|
| Gas temperature        | 250 $^{\circ}\text{C}$ |
| Gas flow               | 14 L/min               |
| Nebulizer gas pressure | 45 psi                 |
| Sheath gas heater      | 300 $^{\circ}\text{C}$ |
| Sheath gas flow        | 12 L/min               |
| Capillary voltage      | 3500 V                 |
| Nozzle voltage         | 0 V                    |

**Table S5.** Specific measurement parameters for venlafaxine and citalopram with LC-QqQ in water samples of the snail experiments. Intraday variations (RSD) is calculated with 1  $\mu\text{g}/\text{L}$  standard (10  $\mu\text{L}$  injection volume and 4 replicates (n)). Limit of quantification= LOQ.

| Name        | Precursor | Product Ion (Quan/Qual) (m/z) | Collision Energy (Setpoint in V) | Retention Time (min) | RSD (%) n=4 | LOQ (ng/L) |
|-------------|-----------|-------------------------------|----------------------------------|----------------------|-------------|------------|
| Venlafaxine | 278       | 260/58                        | 4/16                             | 5.84                 | 3.4         | 10         |
| Citalopram  | 325       | 262/109                       | 20/30                            | 3.92                 | 2.6         | 10         |

### Water Concentrations

**Table S6.** Citalopram water concentrations during the experiment with big ramshorn snail exposed to citalopram. Concentrations are shown in  $\mu\text{g}/\text{L}$ . LOD= Limit of detection, a.w.e.= after water exchange.

|                             | 25 October 2017 | 10 November 2017<br>a.w.e. | 24 November 2017 |
|-----------------------------|-----------------|----------------------------|------------------|
| control                     | <LOD            | <LOD                       | <LOD             |
| 1 $\mu\text{g}/\text{L}$    | 1,14            | 1,2                        | 1,1              |
| 10 $\mu\text{g}/\text{L}$   | 8,5             | 8,93                       | 7,98             |
| 100 $\mu\text{g}/\text{L}$  | 140             | 143                        | 128              |
| 1000 $\mu\text{g}/\text{L}$ | 1213            | 1202                       | 1101             |

**Table S7.** Venlafaxine water concentrations during the experiment with big ramshorn snail exposed to venlafaxine. Concentrations are shown in µg/L. LOD=Limit of detection, b.w.e.= before water exchange, a.w.e.= after water exchange.

|           | 15 June 2018 | 04 July 2018<br>b.w.e. | 04 July 2018<br>a.w.e. | 13 July 2018 |
|-----------|--------------|------------------------|------------------------|--------------|
| control   | <LOD         | <LOD                   | <LOD                   | <LOD         |
| 1 µg/L    | 0,79         | 0,70                   | 0,72                   | 0,72         |
| 10 µg/L   | 8,33         | 8,12                   | 8,21                   | 8,16         |
| 100 µg/L  | 85,21        | 78,32                  | 77,70                  | 77,27        |
| 1000 µg/L | 881          | 866                    | 846                    | 865          |

### CRED

**Table S8.** CRED-criteria of the experiment with big ramshorn snail exposed to citalopram and venlafaxine.

| CRED-criteria: Exposure of Big Ramshorn Snail to Citalopram and Venlafaxine |                                                                                                                                                                                                                                                                                      |
|-----------------------------------------------------------------------------|--------------------------------------------------------------------------------------------------------------------------------------------------------------------------------------------------------------------------------------------------------------------------------------|
| 1. General information                                                      |                                                                                                                                                                                                                                                                                      |
| a. Purpose                                                                  | Aim of the study was to investigate the effect of citalopram and venlafaxine on apical endpoints, the behaviour and biochemical biomarker in big ramshorn snail.                                                                                                                     |
| b. Endpoints                                                                | mortality, weight, behaviour during the exposure, biochemical determination of: B-esterase activity, SOD activity, Hsp70 level and histopathology of hepatopancreas                                                                                                                  |
| 2. Test design                                                              |                                                                                                                                                                                                                                                                                      |
| a. Standard                                                                 | No standard test procedure                                                                                                                                                                                                                                                           |
| b. GLP                                                                      | Not GLP-accredited                                                                                                                                                                                                                                                                   |
| c. Controls                                                                 | Laboratory negative control                                                                                                                                                                                                                                                          |
| d. Validity                                                                 | mortality in control was <10%                                                                                                                                                                                                                                                        |
| 3. Test compound                                                            |                                                                                                                                                                                                                                                                                      |
| a. Identification                                                           | Citalopram hydrobromide<br>1-[3-(Dimethylamino)propyl]-1-(4-fluorophenyl)-1,3-dihydro-5-isobenzofuran carbonitrile hydrobromide<br>CAS: 59729-32-7<br>Venlafaxine hydrochloride<br>(+/-)-1-[2-(Dimethylamino)-1-(4-methoxyphenyl)ethyl]cyclohexanol hydrochloride<br>CAS: 99300-78-4 |
| b. Physico-chemical characteristics                                         | Citalopram: water solubility of 16.56 g/L (TOCRIS 2017)<br>Venlafaxine: water solubility of 100 mmol/L (TOCRIS 2017)                                                                                                                                                                 |
| c. Source                                                                   | Citalopram: Sigma-Aldrich, Product Number: PHR1640-1G; Batch Number: LRAB6012<br>Venlafaxine: Sigma-Aldrich, Product Number: PHR1736-1G; Batch Number: LRAB7761                                                                                                                      |
| d. Purity                                                                   | Citalopram: 99.8% according to the Certificate of Analysis from Sigma-Aldrich<br>Venlafaxine: 99.8% according to the Certificate of Analysis from Sigma-Aldrich                                                                                                                      |
| e. Formulation                                                              | no formulation, no impurities                                                                                                                                                                                                                                                        |
| 4. Test organism                                                            |                                                                                                                                                                                                                                                                                      |
| a. Scientific name                                                          | <i>Planorbis corneus</i>                                                                                                                                                                                                                                                             |
| b. Body weight                                                              | Citalopram experiment: 2.26 ± 0.87 g<br>Venlafaxine experiment: 1.76 ± 0.40 g                                                                                                                                                                                                        |
| c. Age/life stage                                                           | Adult                                                                                                                                                                                                                                                                                |
| d. Reproductive condition                                                   | in reproductive condition                                                                                                                                                                                                                                                            |
| e. Sex                                                                      | hermaphrodite                                                                                                                                                                                                                                                                        |

|                                               |                                                                                                                                                                                                                                                                                                                                                                                        |
|-----------------------------------------------|----------------------------------------------------------------------------------------------------------------------------------------------------------------------------------------------------------------------------------------------------------------------------------------------------------------------------------------------------------------------------------------|
| f. Strain/clone                               | no defined clone                                                                                                                                                                                                                                                                                                                                                                       |
| g. Source                                     | Lab cultured offspring of individuals obtained from Foerdefische (Handewitt, Germany)                                                                                                                                                                                                                                                                                                  |
| h. Acclimatisation                            | 1 day gradually cooling from room temperature to 11°C                                                                                                                                                                                                                                                                                                                                  |
| 5. Exposure conditions                        |                                                                                                                                                                                                                                                                                                                                                                                        |
| a. Schedule                                   | semi-static design with water exchange of 50 % of the test medium once a week                                                                                                                                                                                                                                                                                                          |
| b. System                                     | closed                                                                                                                                                                                                                                                                                                                                                                                 |
| c. Test medium                                | Filtered tap water (iron filter, active charcoal filter, particle filter) cooled to 11°C and aerated                                                                                                                                                                                                                                                                                   |
| d. Temperature                                | Climate chamber set to 11°C.<br>Watertemperature:<br>Citalopram experiment: 10.76 °C<br>Venlafaxine experiment: 12.52 °C                                                                                                                                                                                                                                                               |
| e. pH                                         | Citalopram experiment: 8.28<br>Venlafaxine experiment: 7.3                                                                                                                                                                                                                                                                                                                             |
| f. Hardness                                   | 14.8 mg/L CaCO <sub>3</sub> , 10.4 mg/L HCO <sub>3</sub> <sup>-</sup>                                                                                                                                                                                                                                                                                                                  |
| g. Conductivity                               | Citalopram experiment: 482.74 µS/cm<br>Venlafaxine experiment: 486.47 µS/cm                                                                                                                                                                                                                                                                                                            |
| h. Dissolved oxygen                           | Citalopram experiment: 10.23 mg/L<br>Venlafaxine experiment: 10.08 mg/L                                                                                                                                                                                                                                                                                                                |
| i. Light intensity/quality                    | 10 h : 14 h light:dark cycle; aquaria shaded from direct light with black foil                                                                                                                                                                                                                                                                                                         |
| j. Feeding                                    | Every second day one algae tablet per tank                                                                                                                                                                                                                                                                                                                                             |
| k. Aquaria                                    | 25 L glass aquaria filled with 10 L of medium. covered with glass plane, silicone tubing, aerated with airstones (JBL ProSilent Aeras Micro S2)                                                                                                                                                                                                                                        |
| l. Sand/sediment                              | no sediment tested                                                                                                                                                                                                                                                                                                                                                                     |
| m. Stock solutions                            | Citalopram: Stock solution 1 (100 mg/L) prepared from 124.94 mg citalopram hydrobromide in 1 L dest. Water, stock solution 2 (1 mg/L) produced from stock solution 1 via 1:100 dilution.<br>Venlafaxine: Stock solution 1 (100 mg/L) prepared from 113.14 mg venlafaxine hydrochloride in 1 L dest. water, stock solution 2 (1 mg/L) produced from stock solution 1 via 1:100 dilution |
| n. Nominal concentrations                     | 0. 1. 10. 100. 1000 µg/L                                                                                                                                                                                                                                                                                                                                                               |
| o. Measured concentration                     | Water samples were taken and analysed at the beginning, after 2 weeks before and after water exchange and at the end of the experiment.<br>Mean citalopram: <LoD, 1.15, 8.47, 137, 1172 µg/L<br>Mean venlafaxine: <LoD, 0.73, 8.2, 79.63, 864.15 µg/L                                                                                                                                  |
| p. Method                                     | HPLC-MS (QQ-MS) (LoQ = 1 ng/L)                                                                                                                                                                                                                                                                                                                                                         |
| q. Duration                                   | Citalopram experiment: 26 October 2017–23 November 2017<br>Venlafaxine experiment: 15 June 2018–13 July 2018                                                                                                                                                                                                                                                                           |
| r. Observations                               | Mortality, behaviour during the exposure. body weight, at the end of the experiment samples were taken for biochemical analyses                                                                                                                                                                                                                                                        |
| s. Results                                    | summary table in article                                                                                                                                                                                                                                                                                                                                                               |
| t. Biomass loading                            | Citalopram experiment: mean= 1.13 g/L<br>Venlafaxine experiment: mean=1.23 g/L                                                                                                                                                                                                                                                                                                         |
| 6. Statistical Design and Biological Response |                                                                                                                                                                                                                                                                                                                                                                                        |
| a. Replicates                                 | Three replicate aquaria per test concentration and temperature                                                                                                                                                                                                                                                                                                                         |
| b. Number of organisms                        | Citalopram: 5 snail per replicate<br>Venlafaxine: 7 snail per replicate                                                                                                                                                                                                                                                                                                                |
| c. Design                                     | three blocks, one replicate per treatment present in each block, arranged in randomized order                                                                                                                                                                                                                                                                                          |

|                              |                                                                                                                                                                                                                                           |
|------------------------------|-------------------------------------------------------------------------------------------------------------------------------------------------------------------------------------------------------------------------------------------|
| d. Statistical methods       | Mortality: nested Cox proportional hazards model; body mass, biochemical biomarkers: nested ANOVA; behaviour during exposure: Generalised Liner Mixed Model                                                                               |
| e. Biological response       | Citalopram: decreased weight at 1000 µg/L<br>Qualitative assessment of the hepatopancreas revealed a higher proportion of pronounced irregular shaped apices, dilated lumen of tubules and irregular compartmentation of digestive cells. |
| f. Dose-response             | Venlafaxine: increased sole detachment at 100 µg/L and higher<br>Increased sole detachment at 100 and 1000 µg/L venlafaxine                                                                                                               |
| g. Statistical significances | Citalopram: decreased weight at 1000 µg/L<br>Venlafaxine: increased sole detachment at 100 µg/L and higher                                                                                                                                |
| h. Significance level        | $\alpha = 0.05$ , in cases of multiple comparisons adjusted via sequential Bonferroni                                                                                                                                                     |
| i. Variability               | not estimated                                                                                                                                                                                                                             |
| j. Raw data                  | provided on <a href="https://effectnet-seek.bioquant.uni-heidelberg.de/">https://effectnet-seek.bioquant.uni-heidelberg.de/</a>                                                                                                           |

### Statistical Details

**Table S9.** Detailed statistical information of the assessed parameters of both experiments.

| Parameter                    | Experiment                       | Detailed Statistical Information                                                                                                                                                                   |
|------------------------------|----------------------------------|----------------------------------------------------------------------------------------------------------------------------------------------------------------------------------------------------|
| weight                       | Big ramshorn snail + citalopram  | nested ANOVA: $df=4,10$ ; $F=2,6876$ ; $p=0,0398$ ; post-hoc Dunnett's test [control 1 µg/L] $p=0,0789$ [control 10 µg/L] $p=0,0977$ [control 1000 µg/L] $p=0,0616$ [control 1000 µg/L] $p=0,0136$ |
| weight                       | Big ramshorn snail + venlafaxine | Logarithm transformation: nested ANOVA: $df=4,10$ ; $F=0,6776$ ; $p=0,6093$                                                                                                                        |
| mortality                    | Big ramshorn snail + citalopram  | nested Cox proportional hazards model: $df=4,10$ ; $\chi^2=0$ ; $p=1$                                                                                                                              |
| mortality                    | Big ramshorn snail + venlafaxine | nested Cox proportional hazards model: $df=4,10$ ; $\chi^2=0,0632$ ; $p=0,9995$                                                                                                                    |
| behavior                     | Big ramshorn snail + venlafaxine | generalised linear mixed model: $df=4$ ; $F=6,8118$ ; post-hoc Dunnett's test [control 100 µg/L] $p=0,00932$ [control 1000 µg/L] $p<0,001$                                                         |
| AChE activity                | Big ramshorn snail + citalopram  | Logarithm transformation: nested ANOVA: $df=4,10$ ; $F=0,2707$ ; $p=0,8957$                                                                                                                        |
| AChE activity                | Big ramshorn snail + venlafaxine | Kruskal-Wallis test: $df=4$ ; $\chi^2=3,8627$ ; $p=0,4249$                                                                                                                                         |
| CbE activity (NPA-substrate) | Big ramshorn snail + citalopram  | Logarithm transformation: nested ANOVA: $df=4,10$ ; $F=0,1822$ ; $p=0,9467$                                                                                                                        |
| CbE activity (NPA-substrate) | Big ramshorn snail + venlafaxine | nested ANOVA: $df=4,10$ ; $F=2,0917$ ; $p=0,093$                                                                                                                                                   |
| CbE activity (NPV-substrate) | Big ramshorn snail + citalopram  | nested ANOVA: $df=4,10$ ; $F=2,0789$ ; $p=0,0955$                                                                                                                                                  |
| CbE activity (NPV-substrate) | Big ramshorn snail + venlafaxine | nested ANOVA: $df=4,10$ ; $F=1,7893$ ; $p=0,1431$                                                                                                                                                  |
| SOD activity                 | Big ramshorn snail + citalopram  | nested ANOVA: $df=4,10$ ; $F=1,8002$ ; $p=0,1417$                                                                                                                                                  |
| SOD activity                 | Big ramshorn snail + venlafaxine | nested ANOVA: $df=4,10$ ; $F=0,7864$ ; $p=0,5385$                                                                                                                                                  |
| Hsp70 level                  | Big ramshorn snail + citalopram  | nested ANOVA: $df=4,10$ ; $F=1,124$ ; $p=0,3563$                                                                                                                                                   |
| Hsp70 level                  | Big ramshorn snail + venlafaxine | nested ANOVA: $df=4,10$ ; $F=1,4562$ ; $p=0,2273$                                                                                                                                                  |
| histopathology               | Big ramshorn snail + citalopram  | likelihood ratio test: $df=12$ ; $\chi^2=13,661$ ; $p=0,3228$                                                                                                                                      |
| histopathology               | Big ramshorn snail + venlafaxine | likelihood ratio test: $df=12$ ; $\chi^2=14,602$ ; $p=0,2639$                                                                                                                                      |

### Statistical Output

```
behaviour of big ramshorn snail exposed to venlafaxine:
[1] "summary(GLM.PHS.VEN)"
Generalized linear mixed model fit by maximum likelihood (Laplace
Approximation) [glmerMod]
Family: binomial ( logit )
Formula:
cbind(schwimmend, nicht.schwimmend) ~ Treatment + Tag.nach.Versuchsbeginn +
(1 | AquariumID)
Data: Data.PHS.VEN
Control: glmerControl(optimizer = "bobyqa", optCtrl = list(maxfun = 1e+05))
```

```
AIC BIC logLik deviance df.resid
360 384 -173 346 218
```

```
Scaled residuals:
Min 1Q Median 3Q Max
-1.3600 -0.5033 -0.3636 0.2158 3.6613
```

```
Random effects:
Groups Name Variance Std.Dev.
AquariumID (Intercept) 0.1375 0.3709
Number of obs: 225, groups: AquariumID, 15
```

```
Fixed effects:
Estimate Std. Error z value Pr(>|z|)
(Intercept) -3.63105 0.54840 -6.621 3.56e-11 ***
Treatment1 0.22522 0.62759 0.359 0.7197
Treatment10 0.90063 0.58091 1.550 0.1211
Treatment100 1.63430 0.54676 2.989 0.0028 **
Treatment1000 2.15881 0.53558 4.031 5.56e-05 ***
Tag.nach.Versuchsbeginn -0.01798 0.01519 -1.184 0.2364
---
Signif. codes: 0 '***' 0.001 '**' 0.01 '*' 0.05 '.' 0.1 ' ' 1
```

```
Correlation of Fixed Effects:
(Intr) Trtmn1 Trtm10 Trt100 Tr1000
Treatment1 -0.625
Treatment10 -0.673 0.597
Treatment100 -0.721 0.631 0.681
Treatment1000 -0.741 0.642 0.693 0.743
Tag.nach.Vrsc -0.519 -0.002 -0.003 -0.010 -0.007
[1] "anova(GLM.PHS.VEN)"
Analysis of Variance Table
Df Sum Sq Mean Sq F value
Treatment 4 27.2473 6.8118 6.8118
Tag.nach.Versuchsbeginn 1 1.3792 1.3792 1.3792
[1] "summary(glht(GLM.PHS.VEN,linfct=mcp(Treatment=Dunnett)))"
```

Simultaneous Tests for General Linear Hypotheses

Multiple Comparisons of Means: Dunnett Contrasts

```
Fit: glmer(formula = cbind(schwimmend, nicht.schwimmend) ~ Treatment +
Tag.nach.Versuchsbeginn + (1 | AquariumID), data = Data.PHS.VEN,
family = binomial, control = glmerControl(optimizer = "bobyqa",
optCtrl = list(maxfun = 1e+05)))
```

Linear Hypotheses:

Estimate Std. Error z value Pr(>|z|)

1 - 0 == 0 0.2252 0.6276 0.359 0.98310

10 - 0 == 0 0.9006 0.5809 1.550 0.29376

100 - 0 == 0 1.6343 0.5468 2.989 0.00932 \*\*

1000 - 0 == 0 2.1588 0.5356 4.031 < 0.001 \*\*\*

---

Signif. codes: 0 '\*\*\*' 0.001 '\*\*' 0.01 '\*' 0.05 '.' 0.1 ' ' 1

(Adjusted p values reported -- single-step method)
